# Supplementary material for: Developing efficient catalysts for the OER and ORR using a combination of Co, Ni, and Pt oxides along with graphene nanoribbons and NiCo2O4
Source: Royal Society of Chemistry journal article supplement (doi:10.1039/d0ta05908k), 2020-01-01
Supplement: d0ta05908k1.pdf [file d0ta05908k1.pdf]

Supporting Information for:

Developing efficient catalysts for OER and ORR  
using a combination of Co, Ni, and Pt oxides along  
with graphene nanoribbon and NiCo<sub>2</sub>O<sub>4</sub>

*Leticia S. Bezerra and Gilberto Maia\**

Institute of Chemistry, Federal University of Mato Grosso do Sul; Av. Senador Filinto Muller,  
1555; Campo Grande, MS 79074-460, Brazil

\*Corresponding Author. E-mail: gilberto.maia@ufms.br

Tel.: +55 67 3345 3551. Fax: +55 67 3345 3552.

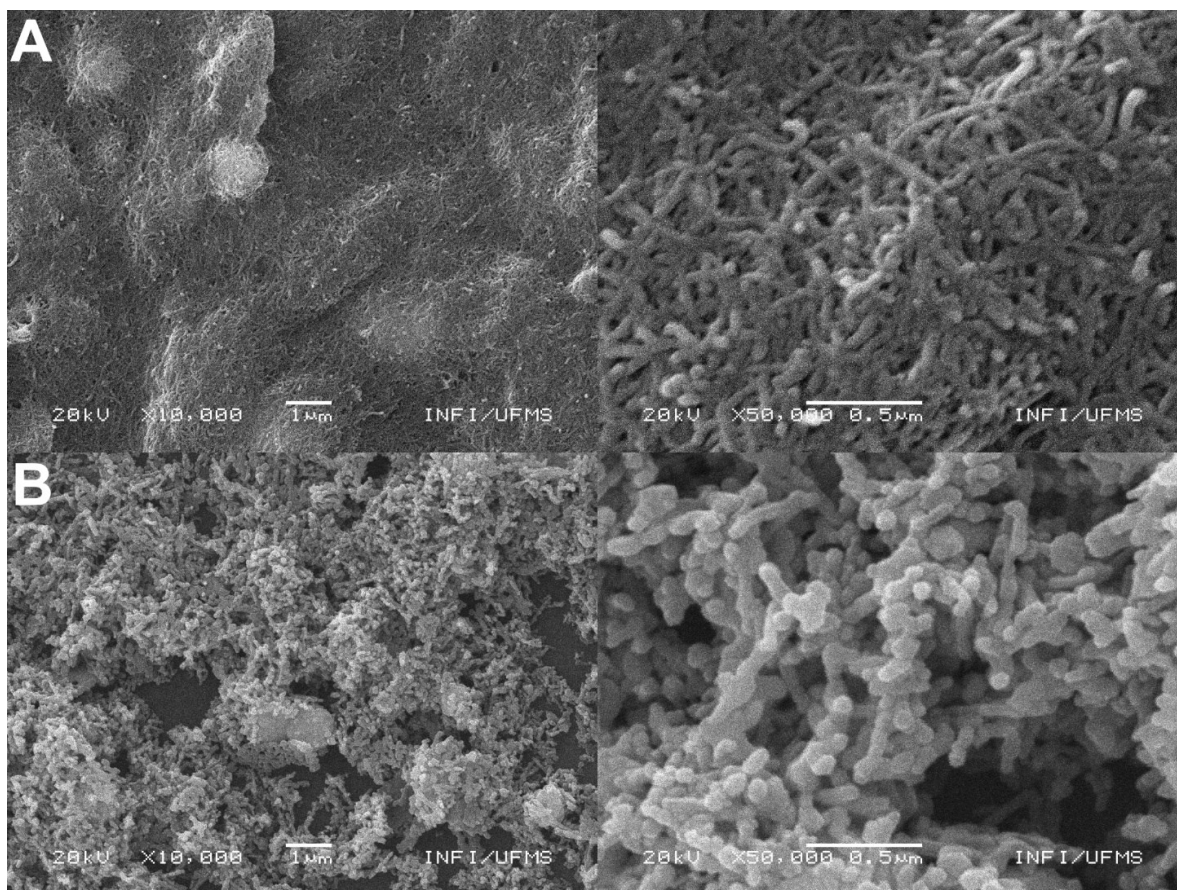

**Figure S1.** SEM images for non-electrochemically stabilized PtCoNi/GNR (A) and NiCo<sub>2</sub>O<sub>4</sub> (B) nanocomposites and nanoparticles (NiCo<sub>2</sub>O<sub>4</sub>) dripped as a film at FTO support.

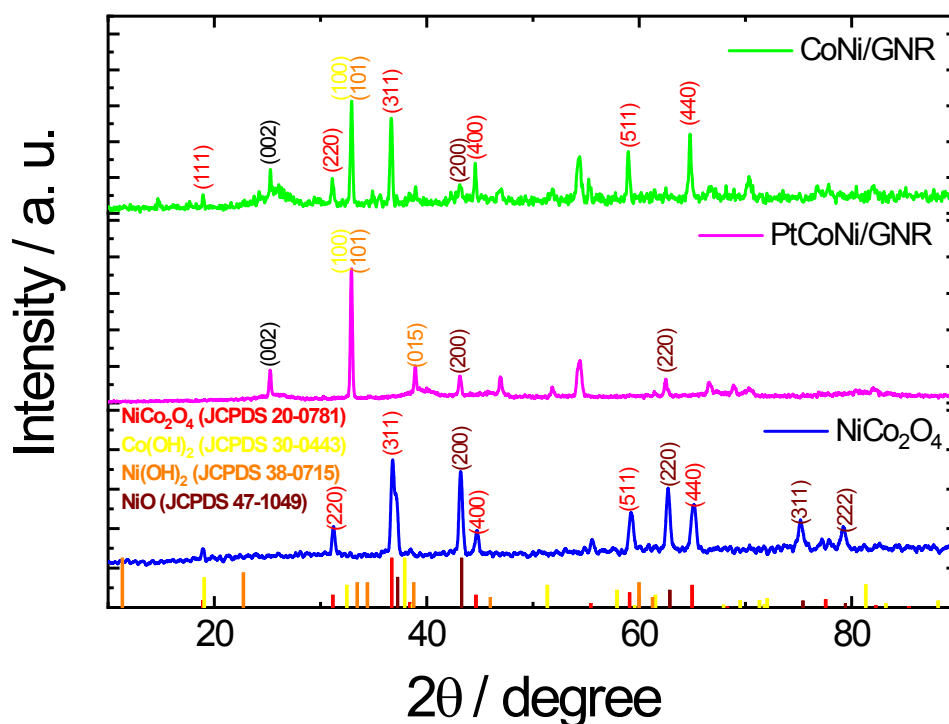

**Figure S2.** XRD patterns for non-electrochemically stabilized CoNi/GNR, PtCoNi/GNR, and NiCo<sub>2</sub>O<sub>4</sub> nanocomposites and nanoparticles (NiCo<sub>2</sub>O<sub>4</sub>).

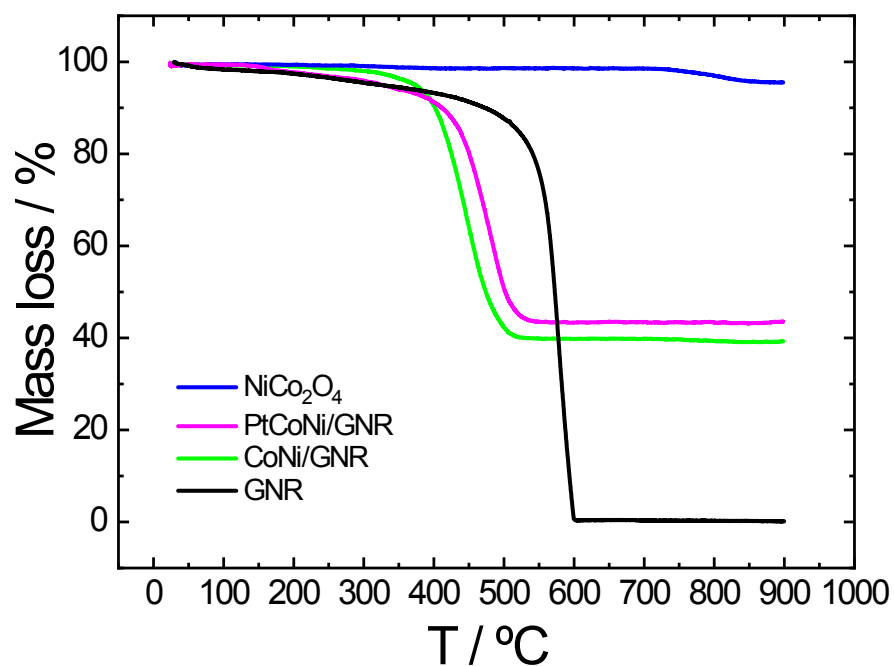

**Figure S3.** TG curves for non-electrochemically stabilized CoNi/GNR, PtCoNi/GNR, and NiCo<sub>2</sub>O<sub>4</sub> nanocomposites and nanoparticles (NiCo<sub>2</sub>O<sub>4</sub>).

**Table S1.** CHN analyses, wt.%.

| Catalysts                        | Elements |       |       |
|----------------------------------|----------|-------|-------|
|                                  | N        | C     | H     |
| NiCo <sub>2</sub> O <sub>4</sub> | <0.05    | <0.05 | <0.05 |

**Table S2.** Results from atomic emission spectroscopy analysis, wt.%.

| Catalyst                         | Elements |    |    |
|----------------------------------|----------|----|----|
|                                  | Co       | Ni | Pt |
| NiCo <sub>2</sub> O <sub>4</sub> | 40       | 36 | -  |

**Table S3.** EDX and TG metal masses (unburned) and TG and EDX mass percentages for non-electrochemically stabilized CoNi/GNR, PtCoNi/GNR, and NiCo<sub>2</sub>O<sub>4</sub> nanocomposites and nanoparticles (NiCo<sub>2</sub>O<sub>4</sub>).

| Catalyst                         | EDX metal mass (%)            | TG metal mass (mass unburned) (%) | TG and EDX mass (%)                            |
|----------------------------------|-------------------------------|-----------------------------------|------------------------------------------------|
| NiCo <sub>2</sub> O <sub>4</sub> | 40.9 Co<br>37.0 Ni            | 0                                 | -                                              |
| CoNi/GNR                         | 38.3 Co<br>33.7 Ni            | 40.0                              | 60 C<br>11.2 O<br>15.3 Co<br>13.5 Ni<br>56.5 C |
| PtCoNi/GNR                       | 28.5 Co<br>29.7 Ni<br>20.6 Pt | 43.5                              | 9.2 O<br>12.4 Co<br>12.9 Ni<br>9.0 Pt          |

O mass % completes the total EDX mass %.

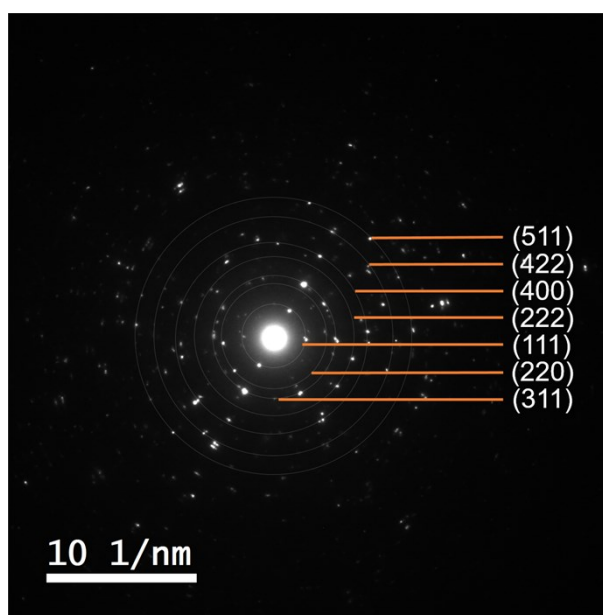

**Figure S4.** Electron diffraction patterns for electrochemically stabilized (after OER) NiCo<sub>2</sub>O<sub>4</sub> nanoparticles.

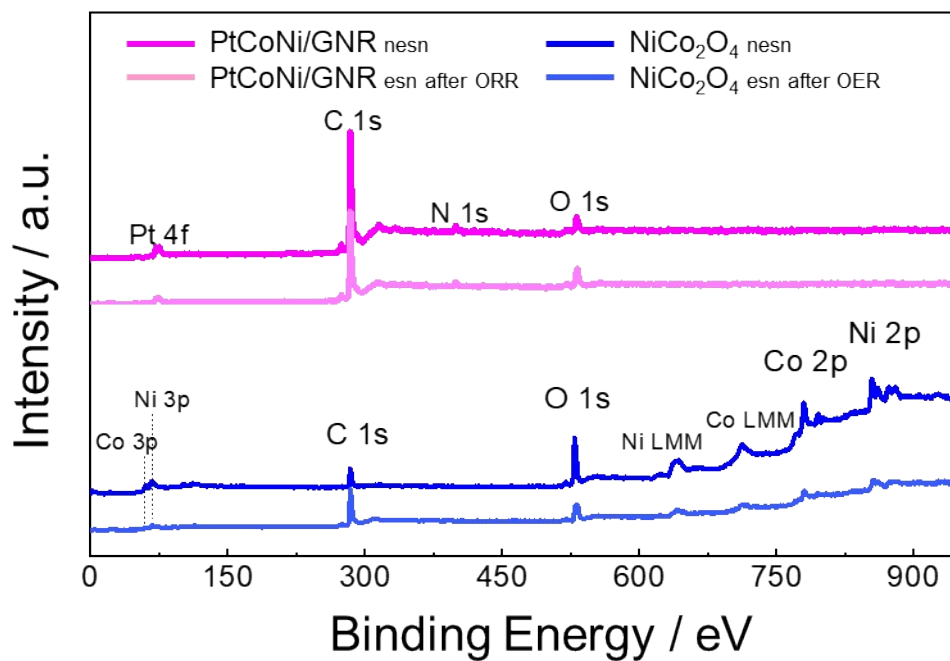

**Figure S5.** XPS survey spectrum for non-electrochemically and electrochemically stabilized PtCoNi/GNR and NiCo<sub>2</sub>O<sub>4</sub> nanocomposites and nanoparticles (NiCo<sub>2</sub>O<sub>4</sub>). nesn = non-electrochemically stabilized nanocomposites or nanoparticles and esn = electrochemically stabilized nanocomposites or nanoparticles.

Intensity / a.u.

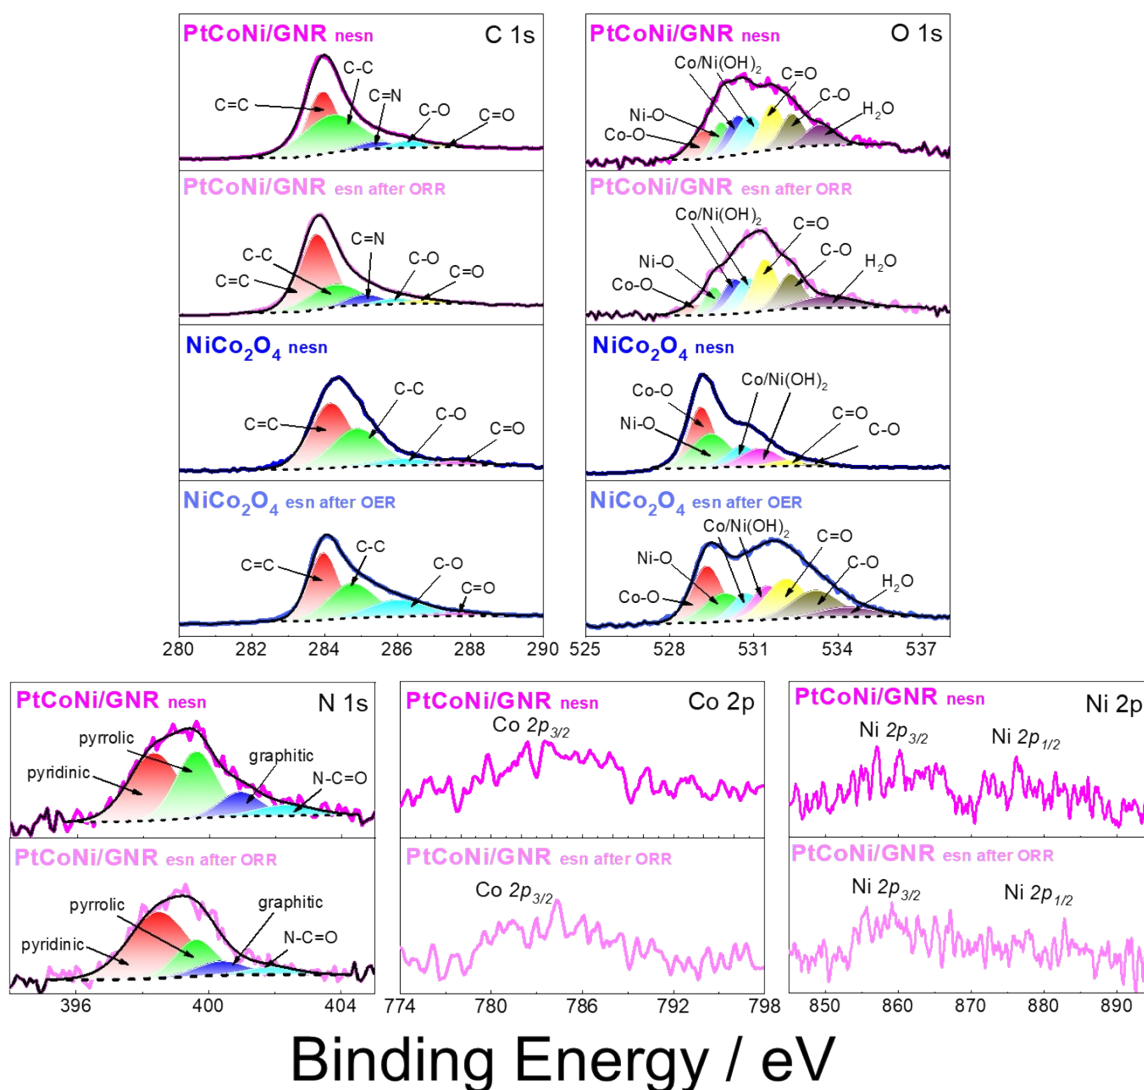

**Figure S6.** High resolution XPS of C 1s, O 1s, N 1s, Co 2p, and Ni 2p for the synthesized catalyst regions. nesn = non-electrochemically stabilized nanocomposites or nanoparticles and esn = electrochemically stabilized nanocomposites or nanoparticles.

**Table S4** – Positions, relative sensitive factors (R.S.F.), atomic and mass percentages obtained from the XPS spectra shown in Figure S5 for non-electrochemically and electrochemically stabilized PtCoNi/GNR and NiCo<sub>2</sub>O<sub>4</sub> nanocomposites and nanoparticles (NiCo<sub>2</sub>O<sub>4</sub>). nesn = non-electrochemically stabilized nanocomposites or nanoparticles and esn = electrochemically stabilized nanocomposites or nanoparticles.

| Catalyst                                          | Name  | Position<br>(eV) | R.S.F. | Atomic % | Mass % |
|---------------------------------------------------|-------|------------------|--------|----------|--------|
| PtCoNi/GNR nesn                                   | O 1s  | 531.00           | 2.93   | 5.85     | 6.60   |
|                                                   | C 1s  | 284.00           | 1      | 89.62    | 75.81  |
|                                                   | N 1s  | 399.00           | 1.8    | 3.50     | 3.45   |
|                                                   | Pt 4f | 72.00            | 15.5   | 1.03     | 14.13  |
| PtCoNi/GNR esn<br>after ORR                       | O 1s  | 532.00           | 2.93   | 9.75     | 11.45  |
|                                                   | C 1s  | 284.00           | 1      | 86.57    | 76.32  |
|                                                   | N 1s  | 398.00           | 1.8    | 3.05     | 3.13   |
|                                                   | Pt 4f | 74.00            | 15.5   | 0.64     | 9.11   |
| NiCo <sub>2</sub> O <sub>4</sub> nesn             | O 1s  | 529.00           | 2.93   | 45.17    | 35.43  |
|                                                   | C 1s  | 284.00           | 1      | 40.76    | 24.00  |
|                                                   | Co 2p | 780.00           | 19.2   | 7.69     | 22.22  |
|                                                   | Ni 2p | 854.00           | 22.2   | 6.37     | 18.34  |
| NiCo <sub>2</sub> O <sub>4</sub> esn after<br>OER | O 1s  | 532.00           | 2.93   | 18.34    | 18.31  |
|                                                   | C 1s  | 284.00           | 1      | 74.65    | 55.96  |
|                                                   | Co 2p | 780.00           | 19.2   | 3.18     | 11.70  |
|                                                   | Ni 2p | 855.00           | 22.2   | 3.83     | 14.03  |

**Tabela S5** – Positions and percentages of the content of functional groups present in non-electrochemically and electrochemically stabilized PtCoNi/GNR and NiCo<sub>2</sub>O<sub>4</sub> nanocomposites and nanoparticles (NiCo<sub>2</sub>O<sub>4</sub>) obtained from high-resolution XPS spectra shown in Figures 2 and S6.

| Catalyst                                                      | Name | Group               | Position<br>(eV) | % content |
|---------------------------------------------------------------|------|---------------------|------------------|-----------|
| PtCoNi/GNR non-electrochemically<br>stabilized nanocomposites | O 1s | Co–O                | 529.56           | 13.62     |
|                                                               |      | Ni–O                | 530.21           | 11.09     |
|                                                               |      | Co(OH) <sub>2</sub> | 530.86           | 16.89     |
|                                                               |      | Ni(OH) <sub>2</sub> | 531.29           | 17.35     |
|                                                               |      | C=O                 | 532.16           | 17.78     |
|                                                               |      | C–O                 | 532.94           | 12.92     |
|                                                               |      | H <sub>2</sub> O    | 534.00           | 10.34     |
|                                                               | C 1s | C=C                 | 283.94           | 41.16     |
|                                                               |      | C–C                 | 284.19           | 47.36     |
|                                                               |      | C=N                 | 285.43           | 5.42      |
|                                                               |      | C–O                 | 286.31           | 4.78      |
|                                                               |      | C=O                 | 287.23           | 1.28      |
|                                                               | N 1s | pyridinic           | 398.32           | 44.26     |
|                                                               |      | pyrrolic            | 399.6            | 35.02     |
| graphitic                                                     |      | 400.94              | 12.79            |           |
| N–C=O                                                         |      | 402.32              | 7.93             |           |

|                                                                                    |           |                     |        |       |
|------------------------------------------------------------------------------------|-----------|---------------------|--------|-------|
| PtCoNi/GNR electrochemically stabilized<br>nanocomposites after ORR                | Pt 4f     | Pt 0                | 70.74  | 23.04 |
|                                                                                    |           | Pt 2+               | 71.94  | 25.39 |
|                                                                                    |           | Pt 4+               | 73.59  | 8.71  |
|                                                                                    | O 1s      | Pt 0                | 74.19  | 17.28 |
|                                                                                    |           | Pt 2+               | 75.34  | 19.04 |
|                                                                                    |           | Pt 4+               | 77.13  | 6.53  |
|                                                                                    |           | Co-O                | 529.21 | 5.62  |
|                                                                                    |           | Ni-O                | 529.94 | 9.37  |
|                                                                                    |           | Co(OH) <sub>2</sub> | 530.74 | 15.97 |
|                                                                                    | C 1s      | Ni(OH) <sub>2</sub> | 531.24 | 17.85 |
|                                                                                    |           | C=O                 | 531.9  | 22.94 |
|                                                                                    |           | C-O                 | 532.88 | 16.13 |
|                                                                                    |           | H <sub>2</sub> O    | 534.28 | 12.11 |
|                                                                                    |           | C=C                 | 283.79 | 57.06 |
|                                                                                    |           | C-C                 | 284.27 | 26.46 |
|                                                                                    |           | C=N                 | 285.11 | 8.38  |
|                                                                                    | N 1s      | C-O                 | 285.97 | 4.54  |
| C=O                                                                                |           | 286.73              | 3.56   |       |
| pyridinic                                                                          |           | 398.48              | 60.82  |       |
| pyrrolic                                                                           |           | 399.62              | 22.62  |       |
| Pt 4f                                                                              | graphitic | 400.4               | 10.81  |       |
|                                                                                    | N-C=O     | 401.88              | 5.76   |       |
|                                                                                    | Pt 0      | 70.58               | 16.69  |       |
|                                                                                    | Pt 2+     | 71.85               | 29.12  |       |
|                                                                                    | Pt 4+     | 73.67               | 11.88  |       |
| NiCo <sub>2</sub> O <sub>4</sub> non-electrochemically stabilized<br>nanoparticles | O 1s      | Pt 0                | 74.36  | 12.52 |
|                                                                                    |           | Pt 2+               | 75.48  | 21.84 |
|                                                                                    |           | Pt 4+               | 78.06  | 7.94  |
|                                                                                    |           | Co-O                | 529.13 | 34.44 |
|                                                                                    |           | Ni-O                | 529.47 | 29.01 |
|                                                                                    | C 1s      | Co(OH) <sub>2</sub> | 530.61 | 14.65 |
|                                                                                    |           | Ni(OH) <sub>2</sub> | 531.24 | 15.28 |
|                                                                                    |           | C=O                 | 532.28 | 4.91  |
|                                                                                    |           | C-O                 | 533.12 | 1.71  |
|                                                                                    |           | C=C                 | 284.17 | 52.1  |
| Co 2p                                                                              | C-C       | 284.89              | 37.25  |       |
|                                                                                    | C-O       | 286.22              | 6.97   |       |
|                                                                                    | C=O       | 287.73              | 3.67   |       |
|                                                                                    | Co 3+     | 779.24              | 38.66  |       |
|                                                                                    | Co 2+     | 780.97              | 28.27  |       |
| Ni 2p                                                                              | satellite | 784.32              | 7.59   |       |
|                                                                                    | Co 3+     | 794.26              | 12.16  |       |
|                                                                                    | Co 2+     | 795.73              | 8.85   |       |
|                                                                                    | Satellite | 797.24              | 4.47   |       |
|                                                                                    | Ni 2+     | 853.83              | 14.43  |       |
|                                                                                    | Ni 3+     | 855.77              | 21.96  |       |
|                                                                                    | Satellite | 860.21              | 14.83  |       |
| Satellite                                                                          | 862.78    | 11.33               |        |       |
|                                                                                    | Ni 2+     | 871.81              | 11.21  |       |
|                                                                                    | Ni 3+     | 874.29              | 9.03   |       |



|                                                                                       |       |                     |        |       |
|---------------------------------------------------------------------------------------|-------|---------------------|--------|-------|
| NiCo <sub>2</sub> O <sub>4</sub> electrochemically stabilized nanoparticles after OER | O 1s  | Satellite           | 878.59 | 11.22 |
|                                                                                       |       | Satellite           | 881.66 | 5.98  |
|                                                                                       |       | Co-O                | 529.34 | 20.97 |
|                                                                                       |       | Ni-O                | 529.96 | 13.94 |
|                                                                                       |       | Co(OH) <sub>2</sub> | 530.75 | 9.99  |
|                                                                                       |       | Ni(OH) <sub>2</sub> | 531.51 | 13.85 |
|                                                                                       |       | C=O                 | 532.16 | 19.33 |
|                                                                                       |       | C-O                 | 533.22 | 15.19 |
|                                                                                       |       | H <sub>2</sub> O    | 534.36 | 6.75  |
|                                                                                       | C 1s  | C=C                 | 283.97 | 42.24 |
|                                                                                       |       | C-C                 | 284.76 | 34.08 |
|                                                                                       |       | C-O                 | 286.01 | 20.2  |
|                                                                                       |       | C=O                 | 287.75 | 3.48  |
|                                                                                       | Co 2p | Co 3+               | 779.42 | 35.96 |
|                                                                                       |       | Co 2+               | 781.19 | 27.08 |
|                                                                                       |       | Satellite           | 783.02 | 14.65 |
|                                                                                       |       | Co 3+               | 795.15 | 13.52 |
|                                                                                       |       | Co 2+               | 797.15 | 6.61  |
|                                                                                       |       | Satellite           | 799.54 | 2.18  |
|                                                                                       | Ni 2p | Ni 2+               | 854.86 | 16.60 |
| Ni 3+                                                                                 |       | 856.78              | 23.43  |       |
| Satellite                                                                             |       | 861.42              | 15.38  |       |
| Satellite                                                                             |       | 864.48              | 7.05   |       |
| Ni 2+                                                                                 |       | 872.95              | 13.38  |       |
| Ni 3+                                                                                 |       | 876.07              | 6.84   |       |
| Satellite                                                                             |       | 879.06              | 8.66   |       |
| Satellite                                                                             |       | 882.12              | 8.66   |       |

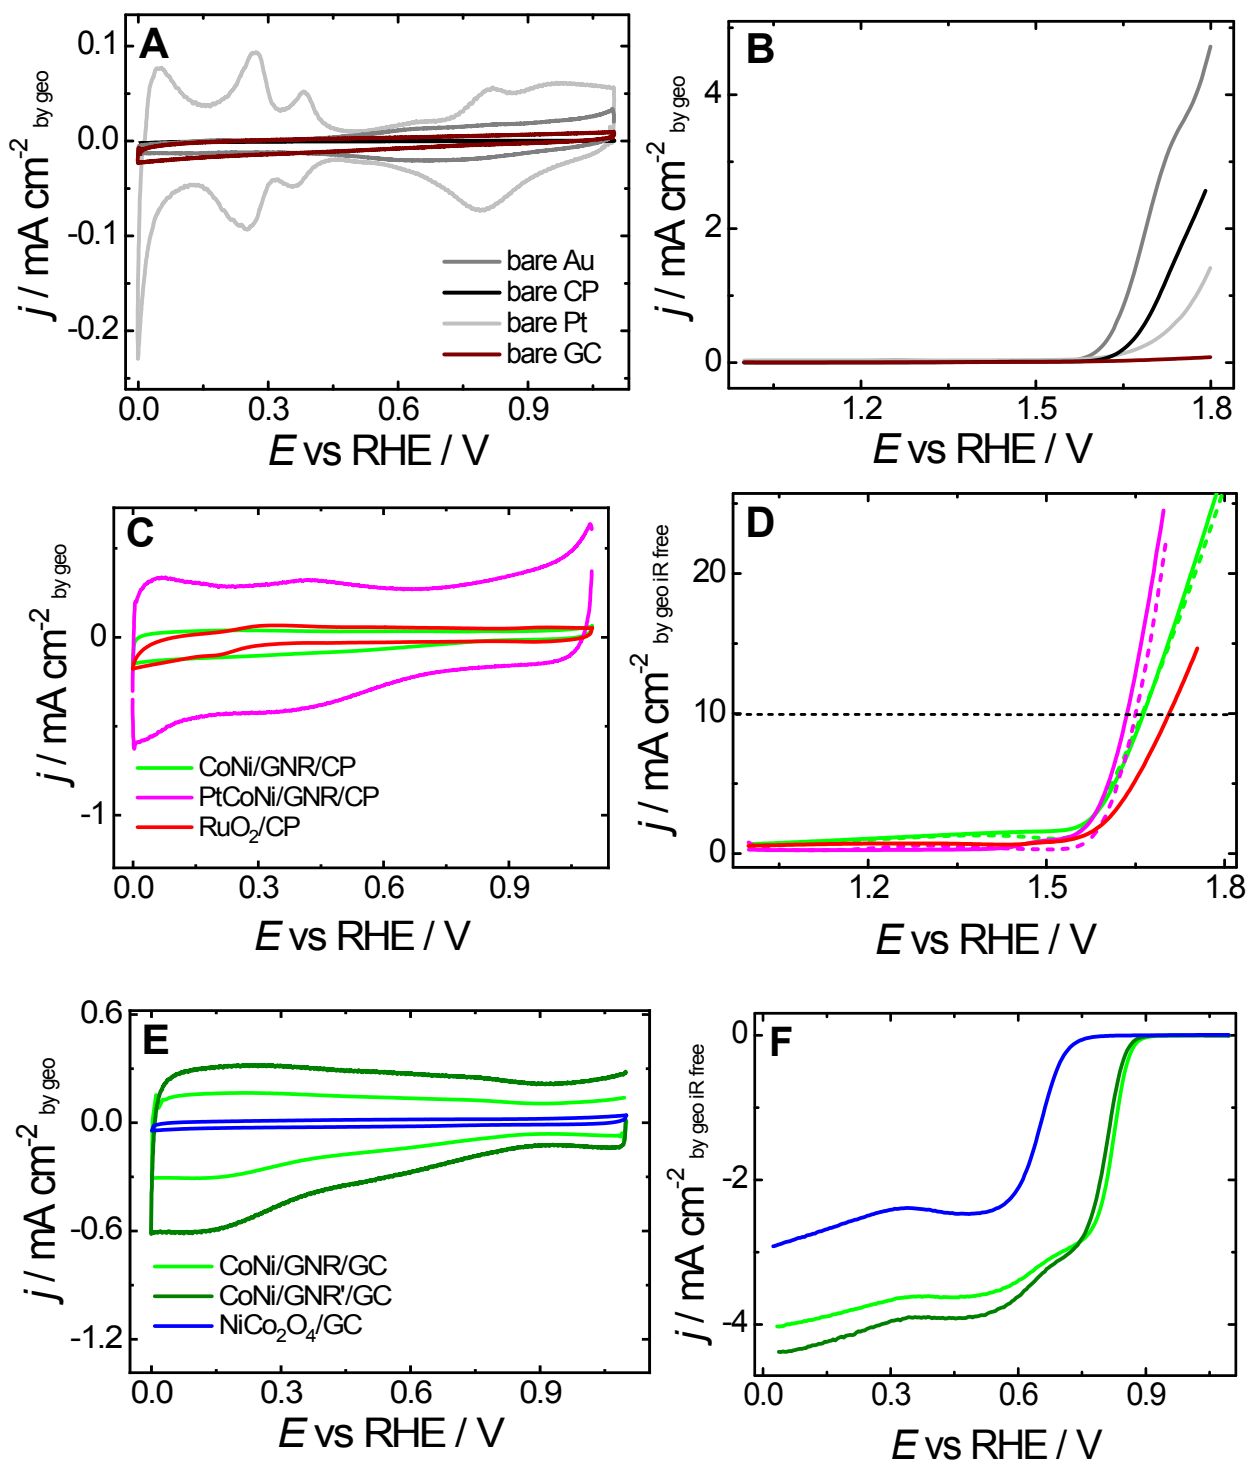

**Figure S7.** (A, C, and E) Cyclic voltammograms for different bare and modified electrodes. Potential scan rate: 50 mV s<sup>-1</sup>, N<sub>2</sub>-saturated 1 M KOH (A and C) and 0.1 M KOH (E). (B and D) Hydrodynamic linear voltammograms recorded for bare and different modified electrodes (stationary linear voltammetry is employed only when CP is used as substrate) in O<sub>2</sub>-saturated 1 M KOH.  $v$ : 5 mV s<sup>-1</sup>,  $\omega$  = 1600 rpm. Scans started at 1.1 V. (F) ORR curves for different

modified electrodes obtained in an O<sub>2</sub>-saturated 0.1 M KOH. Scan rate: 10 mV s<sup>-1</sup> and ω=1600 rpm. Scans started at 0.00 V.

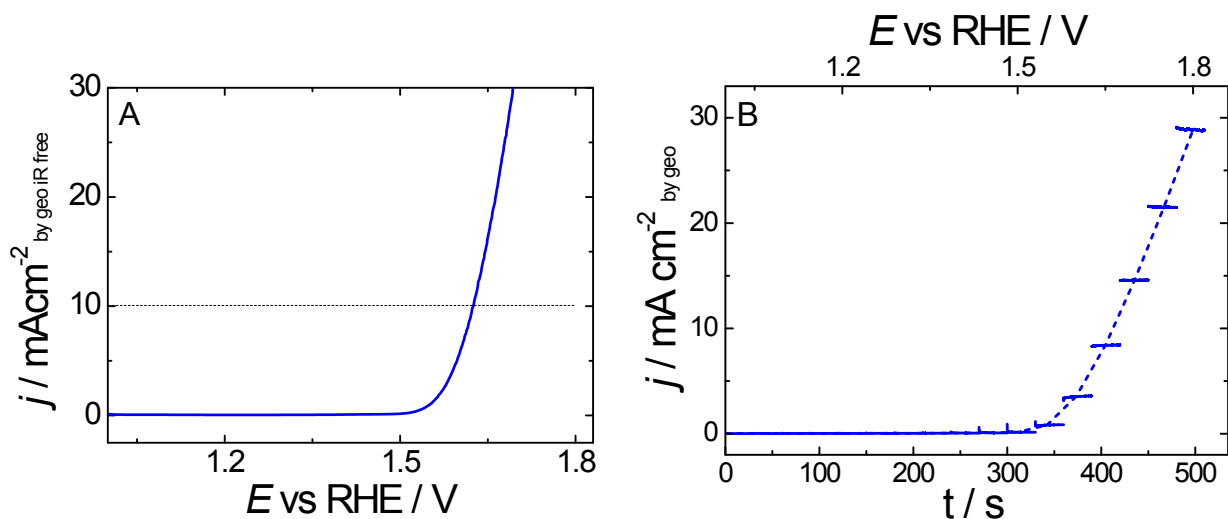

**Figure S8.** (A) Stationary linear voltammogram for NiCo<sub>2</sub>O<sub>4</sub>/CP electrode using O<sub>2</sub>-saturated 1 M KOH.  $v$ : 1 mV s<sup>-1</sup>. Potential scan started at 1.0 V. (B) Chronoamperometric responses for NiCo<sub>2</sub>O<sub>4</sub>/CP electrode in O<sub>2</sub>-saturated 1 M KOH. The potential was kept for 30 seconds in different potentials starting from 1.0 to 1.8 V with 0.05 V for each step. The dashed line was obtained from the chronoamperometric results at different steps by a chord-area plot and plotted as a function of time and potential.

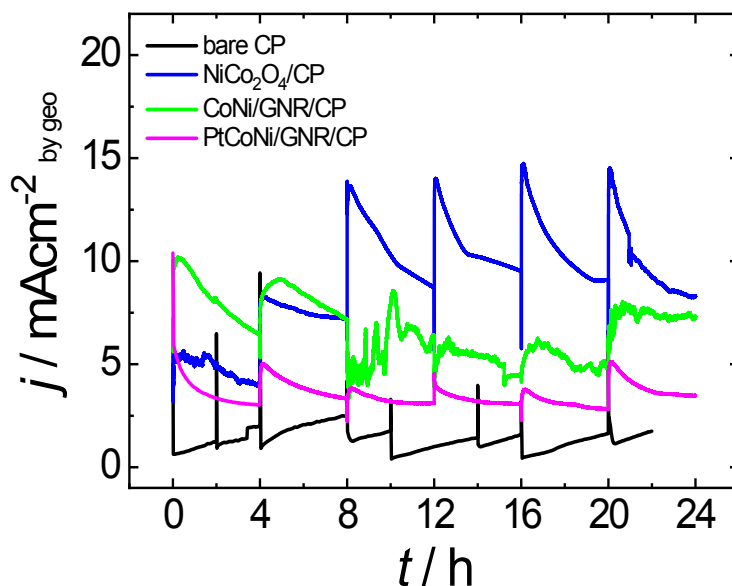

**Figure S9.** Chronoamperometries for bare and different modified CP electrodes at 1.67 V (potential: 10 mA cm<sup>-2</sup><sub>by geo</sub>) obtained in O<sub>2</sub>-saturated 1.0 M KOH solution.

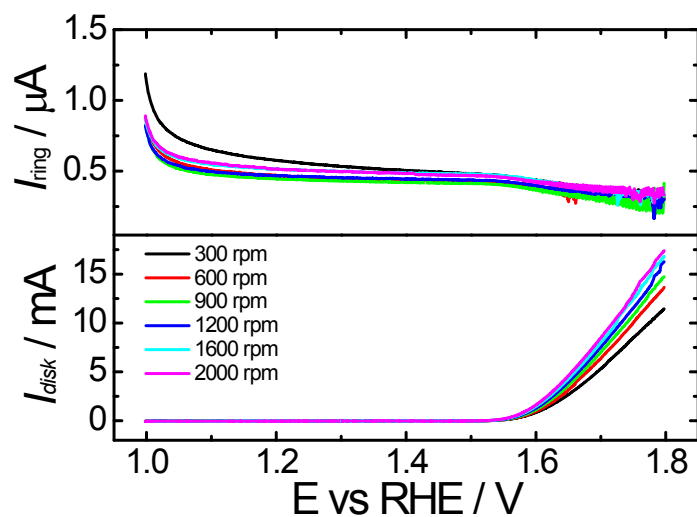

**Figure S10.** (A) Hydrodynamic linear potential scan (HLS) curves for NiCo<sub>2</sub>O<sub>4</sub>/Au disk electrode obtained in N<sub>2</sub>-saturated 1.0 M KOH. Scan rate: 5 mV s<sup>-1</sup>. Scans started at 1.0 V. The ring current responses for the bare Pt ring were obtained by maintaining this electrode at 1.2 V in N<sub>2</sub> saturated 1.0 M KOH, while the potentials on the modified Au disk electrode were scanned in the same solution at various  $\omega$  values and 5 mV s<sup>-1</sup>.

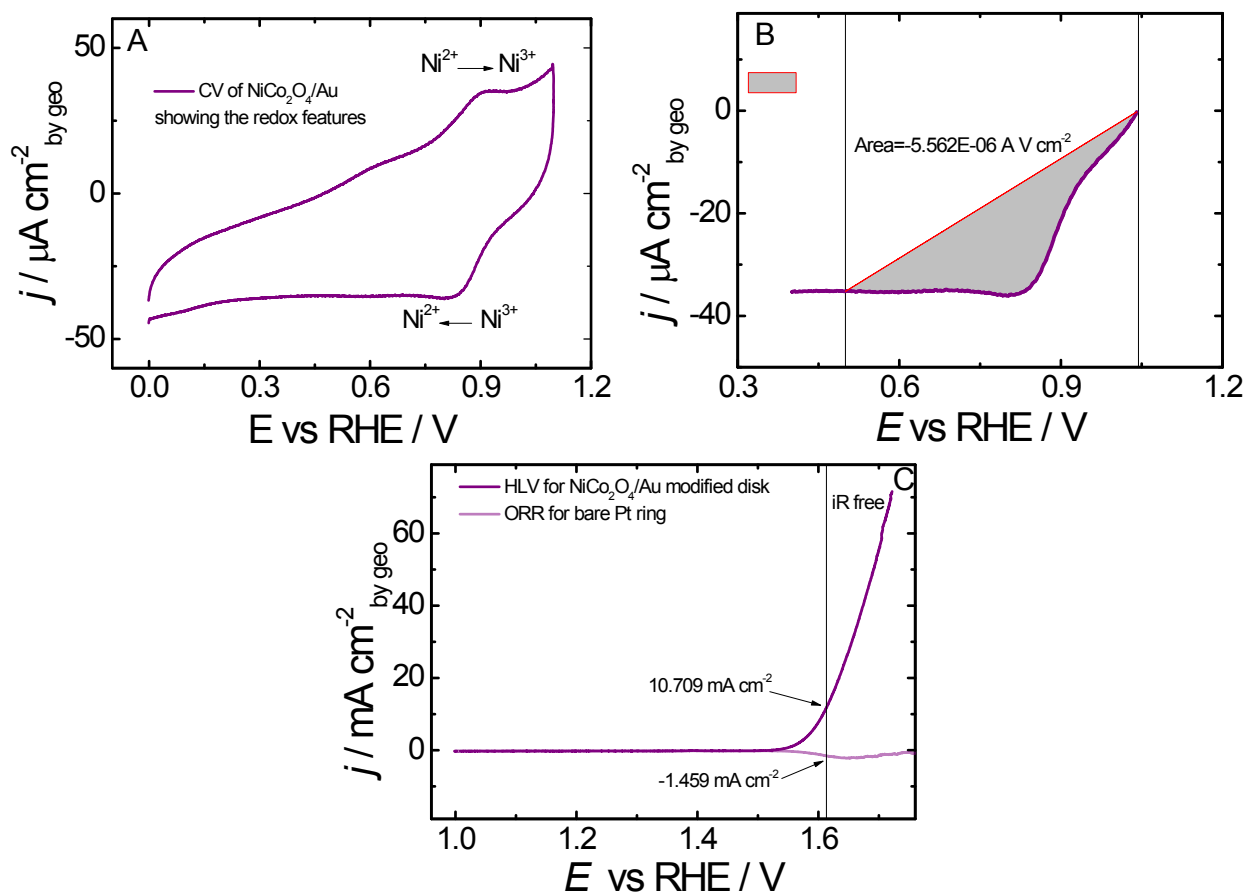

**Figure S11.** (A) Cyclic voltammogram for NiCo<sub>2</sub>O<sub>4</sub>/Au modified disk electrode in N<sub>2</sub>-saturated 1 M KOH. Potential scan rate: 50 mV s<sup>-1</sup>. Potential started at 1.1 V. (B) Amplified part of (A) showing the integrated area from reduction peaks used to determine Ni<sup>2+</sup> surface active species. (C) Hydrodynamic linear potential scan for NiCo<sub>2</sub>O<sub>4</sub>/Au modified disk electrode obtained in N<sub>2</sub>-saturated 1.0 M KOH. Potential scan rate: 5 mV s<sup>-1</sup> and  $\omega = 1600$  rpm. Potential scan started at 1.0 V. The ring current response for the bare Pt ring was obtained by maintaining this electrode at 0.4 V in N<sub>2</sub>-saturated 1.0 M KOH, while the potential on the modified Au disk electrode was scanned in the same solution at  $\omega = 1600$  rpm and 5 mV s<sup>-1</sup>.

**Table S6** – Values related to content, double layer capacitance ( $C_{dl}$ )—obtained from CV responses (Figure S12), electrochemically active surface area (ECSA)—obtained from (Figure S13), overpotential at 10 mA cm<sup>-2</sup> of current density ( $\eta_j$  at 10 mA cm<sup>-2</sup> from Figures 3B, S7B, and S7D), and Tafel slope for bare and modified electrodes (Figure S14).

| Electrode                            | Loading<br>( $\mu\text{g cm}^{-2}$ ) | $C_{dl}$ ( $\mu\text{F}$ ) |              |                           | ECSA ( $\text{cm}^2$ ) |              |                           | $\eta_j$ at 10<br>mA<br>cm <sup>-2</sup><br>(V) | Tafel<br>slope<br>(mV<br>dec <sup>-1</sup> ) |
|--------------------------------------|--------------------------------------|----------------------------|--------------|---------------------------|------------------------|--------------|---------------------------|-------------------------------------------------|----------------------------------------------|
|                                      |                                      | Initial                    | After<br>OER | After<br>OER<br>stability | Initial                | After<br>OER | After<br>OER<br>stability |                                                 |                                              |
| Bare CP                              | -                                    | 0.7                        | 7.2          | -                         | 0.02                   | 0.2          | -                         | -                                               | -                                            |
| NiCo <sub>2</sub> O <sub>4</sub> /CP | 150                                  | 49.8                       | 1,214        | 3,668                     | 1.2                    | 30.4         | 91.7                      | 0.36                                            | 56                                           |
| NiCo <sub>2</sub> O <sub>4</sub> /Au | 150                                  | 10.62                      | 9.52         | 43.06                     | 0.26                   | 0.24         | 1.07                      | 0.35                                            | 56                                           |
| NiCo <sub>2</sub> O <sub>4</sub> /Pt | 150                                  | 9.93                       | 42.71        | 820.83                    | 0.24                   | 1.06         | 20.52                     | 0.36                                            | 56                                           |
| NiCo <sub>2</sub> O <sub>4</sub> /GC | 150                                  | 8.05                       | 10.41        | -                         | 0.20                   | 0.26         | -                         | 0.40                                            | 121                                          |
| PtCoNi/GNR/CP                        | 150                                  | 1,300                      | 832.2        | 1,202                     | 32.4                   | 20.8         | 30.1                      | 0.40                                            | 90                                           |
| CoNi/GNR/CP                          | 150                                  | 420.0                      | 372.3        | 15,724                    | 10.5                   | 9.3          | 293.8                     | 0.43                                            | 131                                          |
| RuO <sub>2</sub> /CP                 | 150                                  | 695.8                      | 175.4        | -                         | 17.4                   | 4.4          | -                         | 0.47                                            | 133                                          |

**Table S7.** Summary for NiCo<sub>2</sub>O<sub>4</sub> OER activity reported in the present study and earlier literature.

| Catalyst                                                                                        | Loading ( $\mu\text{g cm}^{-2}$ ) | $\eta_j$ at 10 mA $\text{cm}^{-2}$ (V)       | Tafel slope ( $\text{mV dec}^{-1}$ ) | Solution  | Ref.                 |
|-------------------------------------------------------------------------------------------------|-----------------------------------|----------------------------------------------|--------------------------------------|-----------|----------------------|
| <b>NiCo<sub>2</sub>O<sub>4</sub></b>                                                            | 150                               | 0.35                                         | 56                                   | 1 M KOH   | <b>Present study</b> |
| NiCo <sub>2</sub> O <sub>4</sub> -R                                                             | 714.3                             | 0.36                                         | 106                                  | 1 M KOH   | [1]                  |
| NiCo <sub>2</sub> O <sub>4</sub> nanoplatelets                                                  | Not reported                      | 0.32 ( $\eta_j$ at 100 mA $\text{cm}^{-2}$ ) | 54                                   | 1 M KOH   | [2]                  |
| Three-dimensional NiCo <sub>2</sub> O <sub>4</sub> core-shell nanowires                         | Not reported                      | 0.32                                         | 47.4-63.1                            | 1 M NaOH  | [3]                  |
| HU-NiCo <sub>2</sub> O <sub>4</sub>                                                             | 69                                | 0.42                                         | 51.3                                 | 1 M NaOH  | [4]                  |
| NWAs                                                                                            | 200                               | Not reported                                 | 62                                   | 1 M KOH   | [5]                  |
| Mixed NiO/NiCo <sub>2</sub> O <sub>4</sub> nanocrystals                                         | 500                               | 0.27                                         | 79.3                                 | 1 M KOH   | [6]                  |
| 3D porous NiCo <sub>2</sub> O <sub>4</sub> nanosheets                                           | 200                               | 0.38                                         | 63.4                                 | 0.1 M KOH | [7]                  |
| Spinel NiCo <sub>2</sub> O <sub>4</sub> 3-D nanoflowers                                         | 25,500                            | 0.38                                         | 137                                  | 1 M KOH   | [8]                  |
| 2D $\alpha$ -Ni(OH) <sub>2</sub>                                                                | 200                               | 0.26                                         | 77.4                                 | 1 M KOH   | [9]                  |
| Hierarchical NiCo <sub>2</sub> O <sub>4</sub> @CoMoO <sub>4</sub> nanowires/nanosheets          | Not reported                      | 0.27 ( $\eta_j$ at 20 mA $\text{cm}^{-2}$ )  | 102                                  | 1 M KOH   | [10]                 |
| Co <sub>3</sub> O <sub>4</sub> nanocages and NiCo <sub>2</sub> O <sub>4</sub> nanosheets        | 1,000                             | 0.32                                         | 84                                   | 0.1 M KOH | [11]                 |
| MOF-derived NiCo <sub>2</sub> O <sub>4</sub> /NiO and NiCo <sub>2</sub> O <sub>4</sub> /NiO-rGO | Not reported                      | 0.39 and 0.34                                | 49 and 66                            | 1 M KOH   | [12]                 |
| Porous NiCo <sub>2</sub> O <sub>4</sub>                                                         | 194                               | 0.30                                         | 70.3                                 | 6 M KOH   | [13]                 |
| NiCo <sub>2</sub> O <sub>4-<math>\delta</math></sub>                                            | Not reported                      | Not reported                                 | 180                                  | 1 M NaOH  | [24]                 |
| Porous nanoscale NiO/NiCo <sub>2</sub> O <sub>4</sub> heterostructure                           | 354                               | 0.26                                         | 44.2                                 | 1 M KOH   | [15]                 |
| Hierarchical NiCo <sub>2</sub> O <sub>4</sub> hollow nanospheres                                | 400                               | 0.42 ( $\eta_j$ at 5 mA $\text{cm}^{-2}$ )   | Not reported                         | 0.1 M KOH | [16]                 |
| Spinel based NiCo <sub>2</sub> O <sub>4</sub>                                                   | 394                               | 0.35                                         | 43                                   | 1 M KOH   | [17]                 |
| NiCo <sub>2</sub> O <sub>4</sub> nanoframe                                                      | 285                               | 0.27                                         | 82                                   | 1 M KOH   | [18]                 |

NiCo<sub>2</sub>O<sub>4</sub>-R = NiCo<sub>2</sub>O<sub>4</sub> obtained from the residual solution; HU-NiCo<sub>2</sub>O<sub>4</sub> = hierarchical hollow urchins of NiCo<sub>2</sub>O<sub>4</sub>; NWAs = 1D NiCo<sub>2</sub>O<sub>4</sub> nanowire arrays.

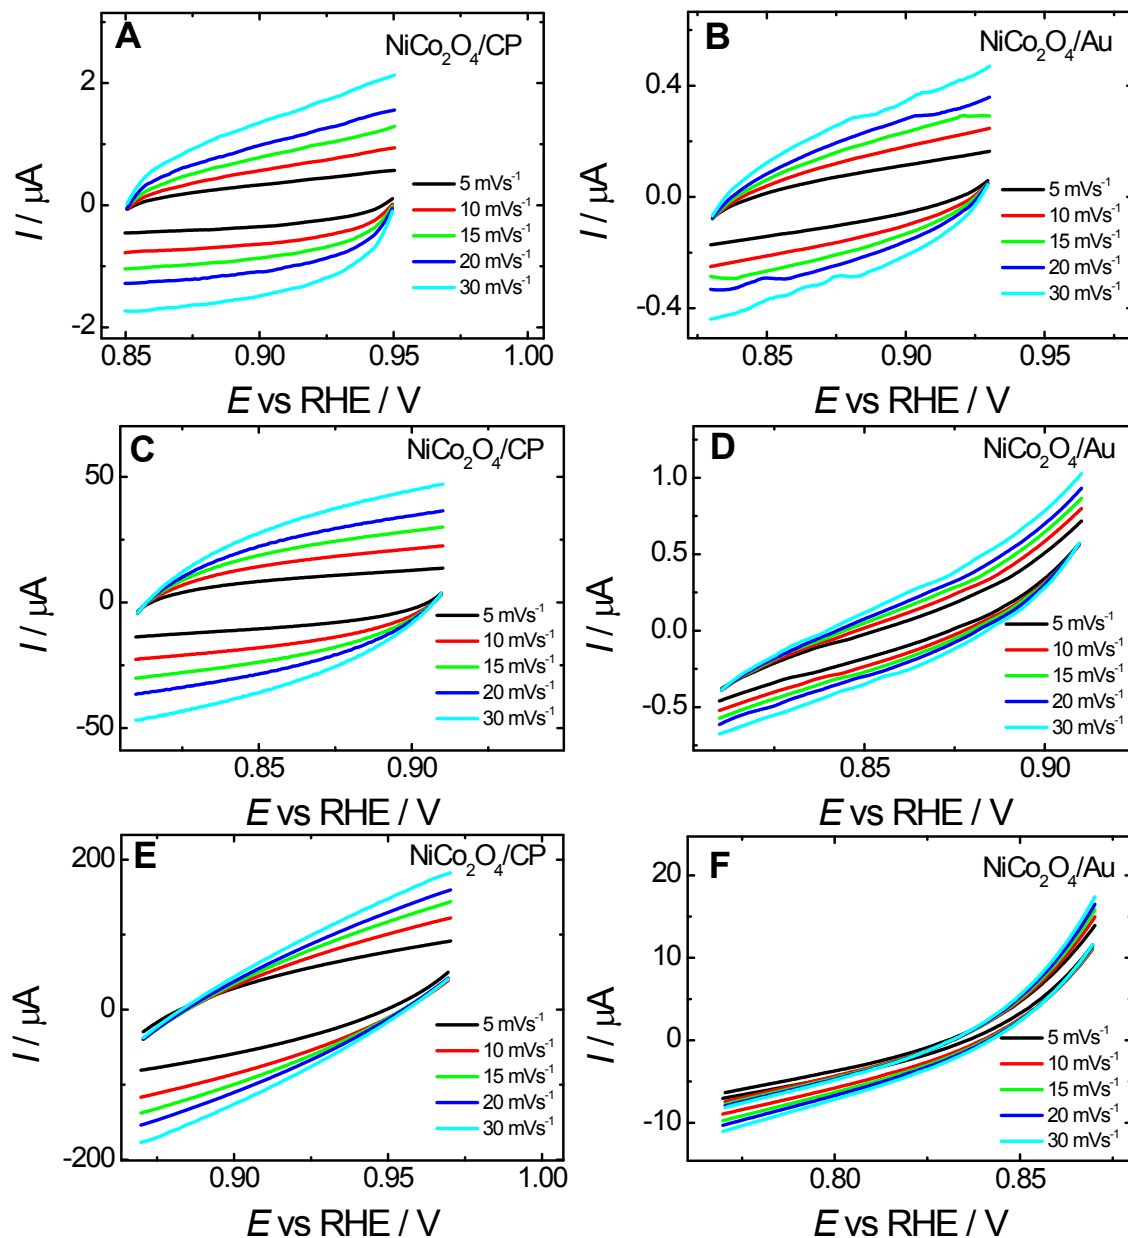

**Figure S12.** Cyclic voltammograms measured in a non-Faradaic potential region—also comprising the open circuit potential (OCP)—for different modified electrodes in  $\text{N}_2$ -saturated 1 M KOH before OER (A and B), after OER (C and D), and after OER stability test (E and F). The modified electrodes were kept in each vertex potential for 10 sec before starting the next potential sweep. Scans started at higher potentials.



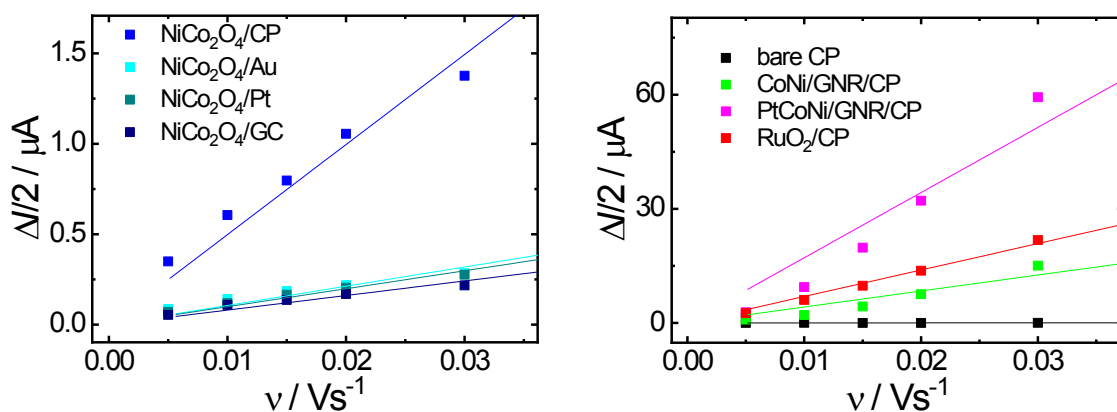

**Figure S13.** Plots related to the differences between anodic and cathodic double layer charging currents (Figure S12A-B, before OER) divided by 2 ( $\Delta I = (I_a - I_c)/2$ ), measured in the OCP, which is also in a non-Faradaic potential region, relative to the potential scan rates. The slopes of these

plots result in a double-layer capacitance ( $C_{dl} = \frac{\Delta I}{2\nu}$ ) values (see Table S6) used for determining

electrochemically active surface areas ( $ECSA = \frac{C_{dl}}{C_s}; C_s = 0.040 \text{ mF cm}^{-2} \text{ in } 1 \text{ M KOH}$  [19]) for different modified electrodes in  $N_2$ -saturated 1 M KOH.

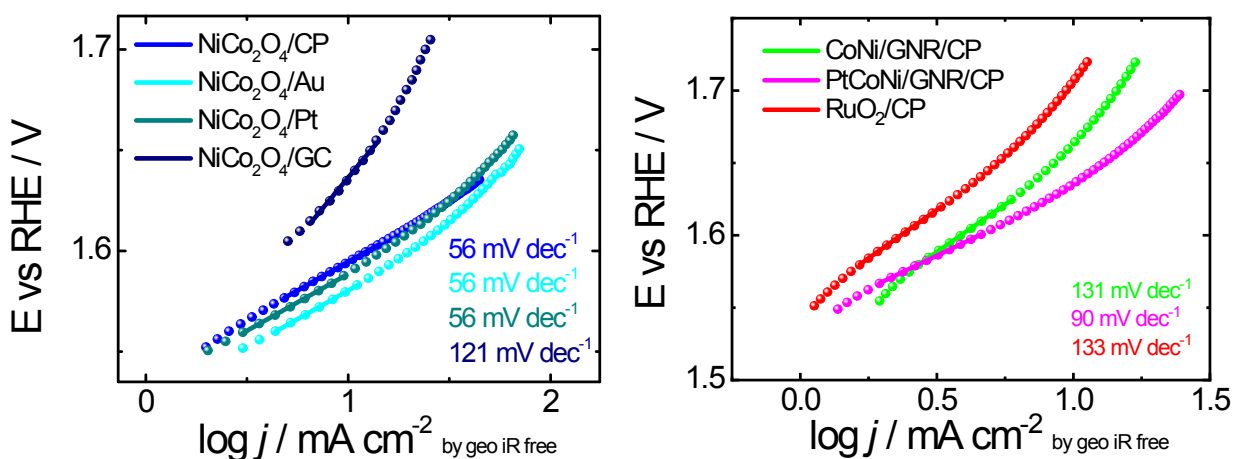

**Figure S14.** Tafel plots based on the data (during OER) from Figures 3B, S7B, and S7D for bare and different modified electrodes in  $O_2$ -saturated 1.0 M KOH.

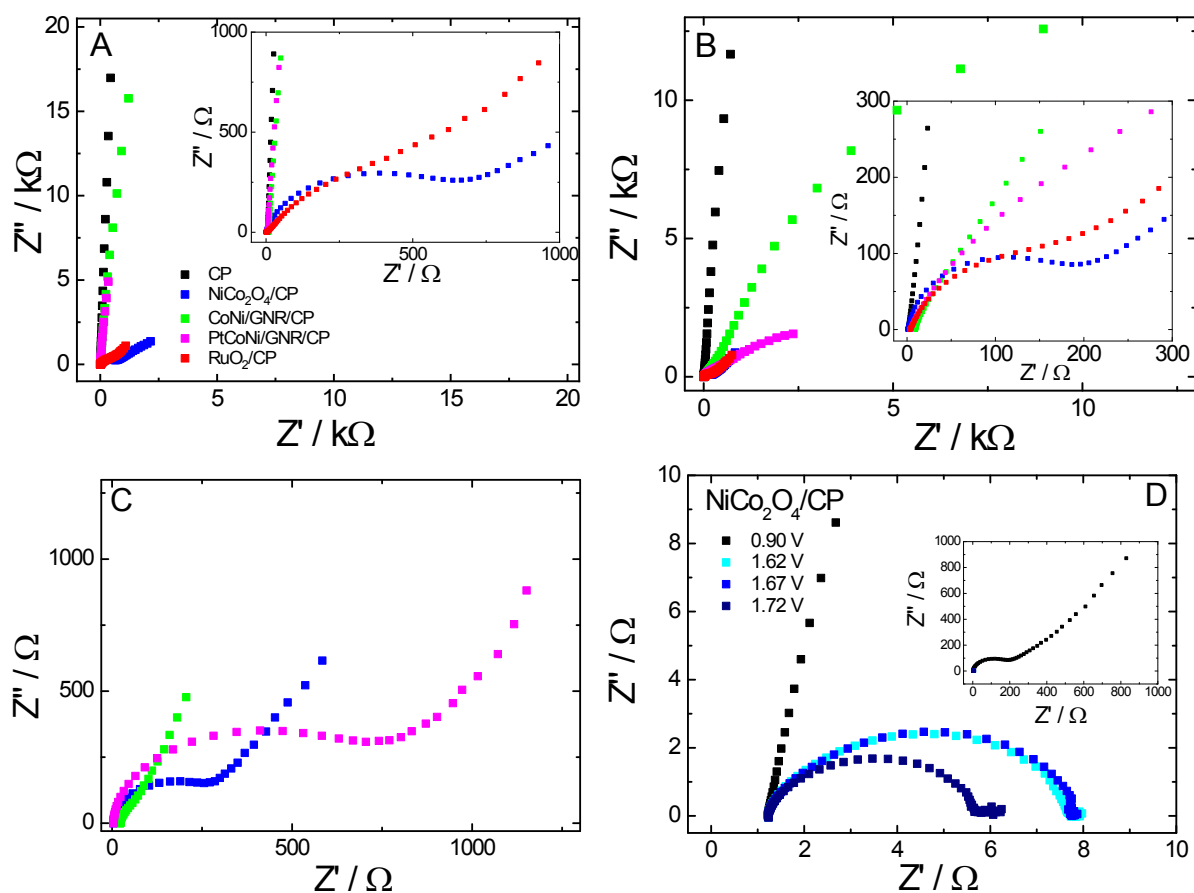

**Figure S15.** EIS results related to (A) initial electrochemical measurements, (B) after OER measurements, and (C) after OER long-term stability test, for bare and different modified CP electrodes, and (D) for  $NiCo_2O_4/CP$  electrode at different potentials without iR compensation (0.90 V = OCP, and 1.62, 1.67, and 1.72 V = potential, where the densities: 5, 10, and 20  $mA\ cm^{-2}_{by\ geo}$ , respectively) are obtained in  $N_2$ -saturated 1.0 M KOH solution. Potential perturbation: 10 mV (rms). Frequency range: 100 kHz–10 mHz. Constant potential for EIS acquisition: OCP ((A) 0.96, (B) 0.86, and (C) 0.85 V vs. RHE on average). Inset: Impedance plane plots restricted to (A) 1000, (B) 300, and (D) 1000  $\Omega$ . The  $R_u$  value used for iR compensation in Figures 3B and S7D was 3.7  $\Omega$  on average.

**Table S8** – Values related to content,  $C_{dl}$  – obtained from CV responses (Figure S16), ECSA – obtained from (Figure S17),  $E_{1/2}$  = potential at half limiting current density values (Figures 3D and S7F),  $n_{K-L}$  = number of electrons obtained from Kouteck-Levich plot (Figure S18), %  $HO_2^-$  = peroxide percentage (Figure S19), and Tafel slope for modified electrodes (Figure S20).

| Electrode                            | Content<br>( $\mu\text{g cm}^{-2}$ ) | $C_{dl}$ ( $\mu\text{F}$ ) |              |                           | ECSA ( $\text{cm}^2$ ) |              |                           | $E_{1/2}$<br>(V) | $n_{K-L}$ | % $HO_2^-$ | Tafel slope<br>( $\text{mV dec}^{-1}$ ) |      |
|--------------------------------------|--------------------------------------|----------------------------|--------------|---------------------------|------------------------|--------------|---------------------------|------------------|-----------|------------|-----------------------------------------|------|
|                                      |                                      | Initial                    | After<br>RRO | After<br>RRO<br>stability | Initial                | After<br>RRO | After<br>RRO<br>stability |                  |           |            |                                         |      |
| Pt(20%)C/GC                          | 150                                  | 450                        | 511          | –                         | 11.3                   | 12.8         | –                         | 0.87             | 3.9       | 17         | –64                                     | –144 |
| PtCoNi/GNR/GC                        | 150                                  | 636                        | 625          | 378                       | 15.9                   | 15.6         | 9.4                       | 0.80             | 3.6       | 34         | –60                                     | –253 |
| PtCoNi/GNR'/G<br>C                   | 250                                  | 1,110                      | 1,190        | 1,790                     | 27.8                   | 29.8         | 44.6                      | 0.82             | 3.6       | 20         | –60                                     | –253 |
| CoNi/GNR/GC                          | 150                                  | 168                        | 209          | –                         | 4.2                    | 5.2          | –                         | 0.81             | 2.8       | 34         | –41                                     | –332 |
| CoNi/GNR'/GC                         | 250                                  | 396                        | 446          | –                         | 9.9                    | 11.2         | –                         | 0.79             | 2.8       | 34         | –39                                     | –255 |
| NiCo <sub>2</sub> O <sub>4</sub> /GC | 150                                  | 5.8                        | 5.7          | –                         | 0.14                   | 0.14         | –                         | 0.65             | 2.2       | 78         | –67                                     | –    |
| GNR/GC                               | 150                                  | 940                        | 852          | –                         | 23.5                   | 21.3         | –                         | 0.74             | 2.3       | 59         | –64                                     | –289 |

**Table S9.** Summary for PtCoNi/GNR ORR activity reported in the present work and earlier literature for other catalysts.

| Catalyst                                                                   | $E_{1/2}$ (V)      | Loading ( $\mu\text{g cm}^{-2}$ ) | Mass activity at 0.85 V ( $\text{mA } \mu\text{g}^{-1}$ ) | Specific activity at 0.85 V ( $\text{mA cm}^{-2}$ ) | Solution  | n       | Tafel slope ( $\text{mV dec}^{-1}$ ) | Ref.                 |
|----------------------------------------------------------------------------|--------------------|-----------------------------------|-----------------------------------------------------------|-----------------------------------------------------|-----------|---------|--------------------------------------|----------------------|
| <b>PtCoNi/GNR'</b>                                                         | 0.82               | 250                               | 0.19                                                      | 0.01                                                | 0.1 M KOH | 3.9     | -64<br>-144                          | <b>Present study</b> |
| Hierarchical NiCo <sub>2</sub> O <sub>4</sub> hollow nanospheres           | Not reported       | 400                               | Not reported                                              | Not reported                                        | 0.1 M KOH | 3.0-4.0 | -67<br>-102                          | [16]                 |
| CoNi@N-C                                                                   | 0.82               | 250                               | Not reported                                              | Not reported                                        | 0.1 M KOH | 3.8     | -56.9 to<br>-69.1                    | [20]                 |
| N-doped carbon stabilized Co-Pt bimetallic nanoalloys                      | 0.87               | 125                               | 35.3 (0.8 V)                                              | 4.5 mA cm <sup>-2</sup> (0.8 V)                     | 0.1 M KOH | 4.0     | -66                                  | [21]                 |
| NiCo@GC                                                                    | 0.81               | 500                               | Not reported                                              | Not reported                                        | 0.1 M KOH | 3.9     | -52.1                                | [22]                 |
| A-CoPt-NC                                                                  | 0.96               | 318                               | 45.47 (0.9 V)                                             | 1.41 (0.9 V)                                        | 0.1 M KOH | 3.7     | Not reported                         | [23]                 |
| Co/N-PCNF                                                                  | 0.87               | 250                               | Not reported                                              | Not reported                                        | 0.1 M KOH | 3.9     | -99.3                                | [24]                 |
| NiCo <sub>2</sub> O <sub>4</sub> -rGO hybrid nanosheets                    | Not reported       | 400                               | Not reported                                              | Not reported                                        | 0.1 M KOH | 3.8     | Not reported                         | [25]                 |
| Mesoporous NiCo <sub>2</sub> O <sub>4</sub> nanoplate                      | ~0.86              | 400                               | 0.075                                                     | Not reported                                        | 0.1 M KOH | 4.0     | -51                                  | [26]                 |
| Three-dimensional (3D) macroporous NiCo <sub>2</sub> O <sub>4</sub> sheets | Not reported       | 804                               | 0.001 (-0.1 V vs. Ag/AgCl)                                | Not reported                                        | 0.1 M KOH | 3.8     | Not reported                         | [27]                 |
| C/NiCo <sub>2</sub> O <sub>4</sub>                                         | 0.59 V vs. Ag/AgCl | 113.2                             | Not reported                                              | Not reported                                        | 0.1 M KOH | 3.9     | Not reported                         | [28]                 |
| Spinel NiCo <sub>2</sub> O <sub>4</sub>                                    | 0.82               | Not reported                      | Not reported                                              | Not reported                                        | 1 M NaOH  | 4.0     | -52<br>-179                          | [29]                 |

CoNi@N-C = porous N-doped carbon-encapsulated CoNi alloy nanoparticle composite; NiCo@GC = graphitic carbon-supported NiCo alloys; A-CoPt-NC = atomic Pt-Co nitrogen-carbon-based catalyst; Co/N-PCNF = cobalt, nitrogen dual-doped porous carbon nanosheet-assembled flowers; C/NiCo<sub>2</sub>O<sub>4</sub> = carbon supported nickel cobaltite nanofibers.

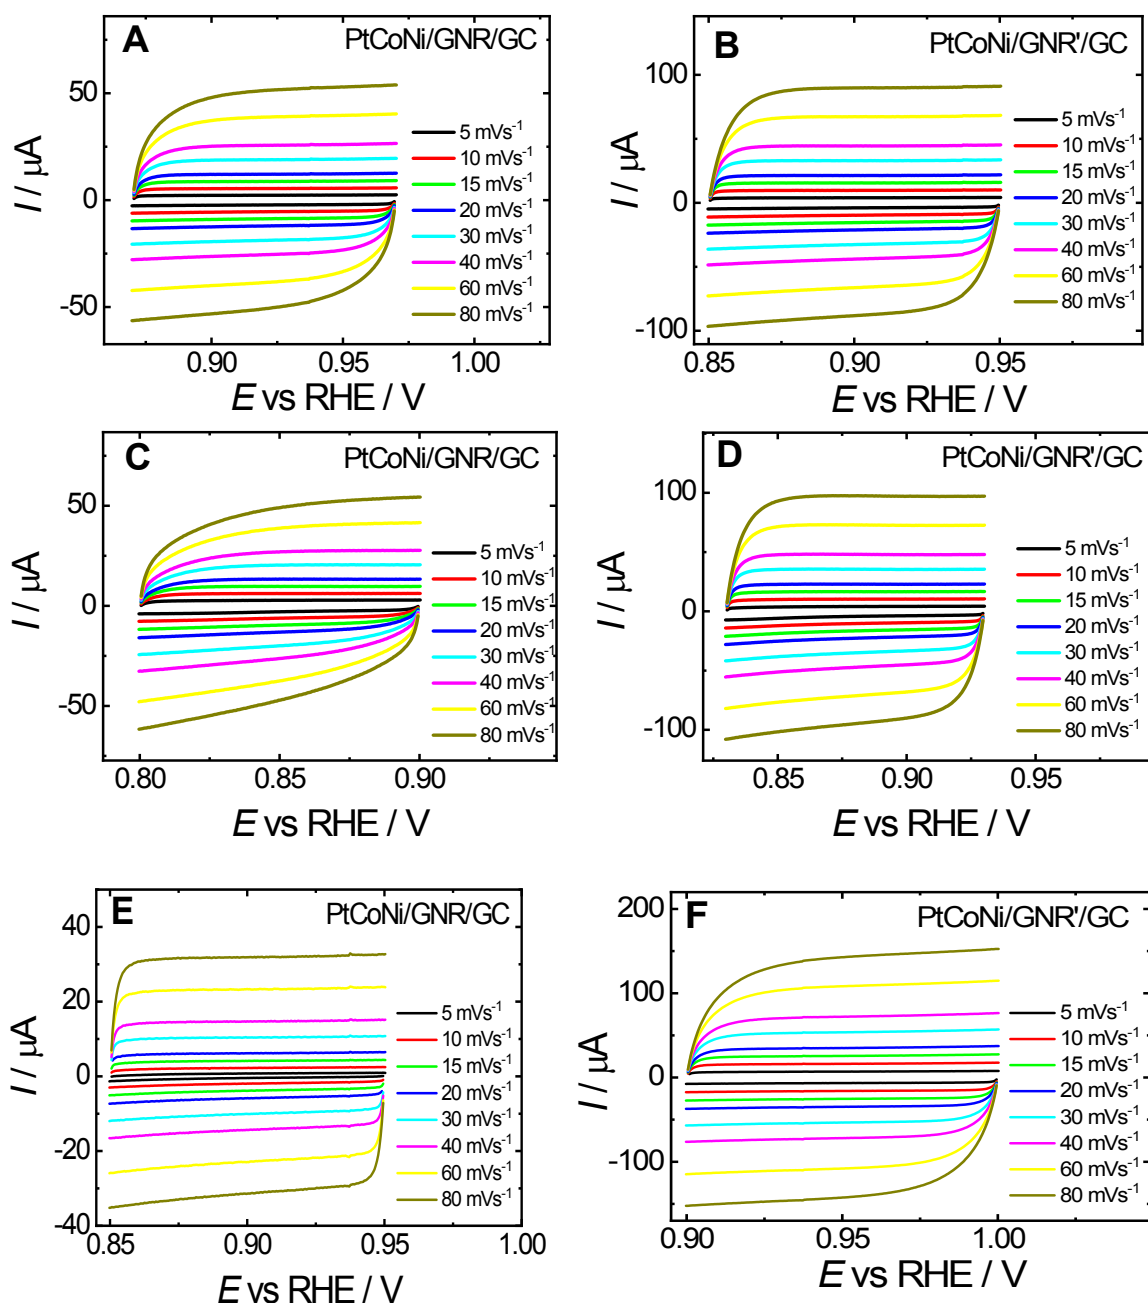

**Figure S16.** Cyclic voltammograms measured in a non-Faradaic potential region—also involving the OCP—under different contents (see Table S8) for modified electrodes in  $N_2$ -saturated 0.1 M KOH before ORR (A and B), after ORR (C and D), and after stability test for ORR (E and F). The modified electrodes were kept in each vertex potential for 10 sec before starting the next potential sweep. Scans started at higher potentials.

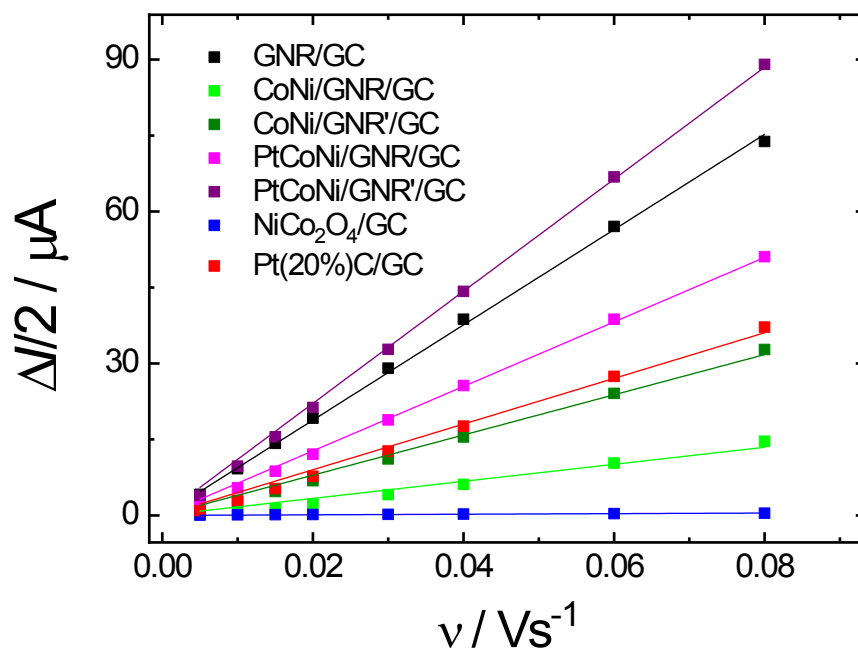

**Figure S17.** Plots related to the differences between anodic and cathodic double layer charging currents (Figure S16A-B, before ORR) divided by 2 ( $\Delta I = I_a - I_c$ )/2, measured in the OCP, which is also in a non-Faradaic potential region, as a function of potential scan rates. The slopes of these plots result in  $C_{dl}$  values (see Table S8) used for determining  $ECSA$  ( $C_s = 0.040 \text{ mF cm}^{-2}$  [19] also considered for 0.1 M KOH) for different modified electrodes in  $N_2$ -saturated 0.1 M KOH.

$$\text{Specific activity (SA)} = ((I \times I_d)/(I_d - I)) = I_k/ECSA \quad [30] \quad (S1)$$

where  $I$  is the measured current at 0.8 or 0.85 V and  $I_d$  and  $I_k$  are the diffusion-limited and kinetic currents, respectively.

$$\text{Mass activity (MA)} = I_k/(L_{\text{PGM}} \times A_{\text{geo}}) \quad [30] \quad (S2)$$

where  $A_{\text{geo}}$  is the geometric GC surface area ( $\text{cm}^2$ ) and  $L_{\text{PGM}}$  is the Pt-group metal content of the working electrode ( $\text{mg cm}^{-2}$ ).

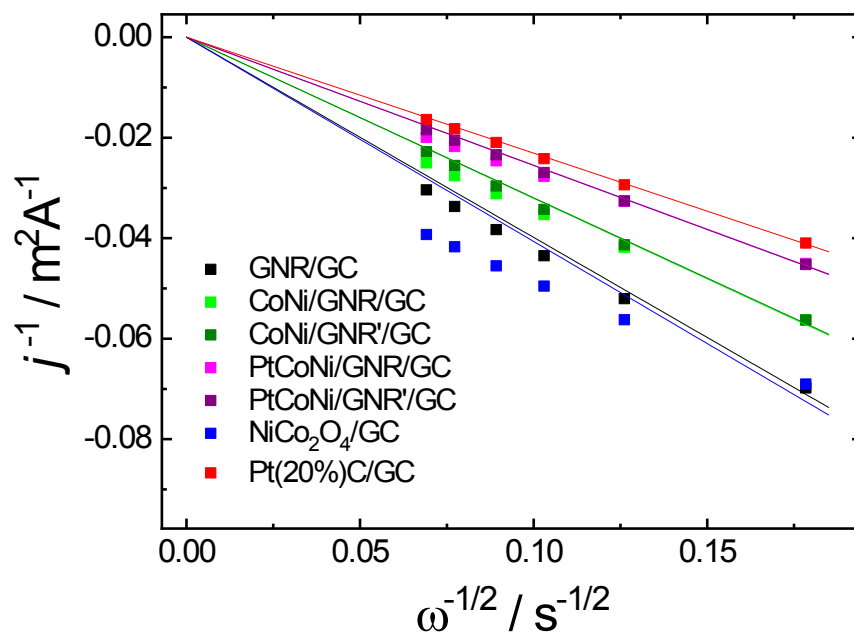

**Figure S18.** Koutecký – Levich curves ( $1/(j_{\text{lim}} = I_{\text{lim}} \text{ disc}/\text{geometric area of the disk})$ ) vs.  $\omega^{-1/2}$  obtained from the curves as shown in Figures 3D and S7F (obtained in different rotation rates) at 0.3 V, and specifically at 0.4 V for the Pt/C/GC electrode.

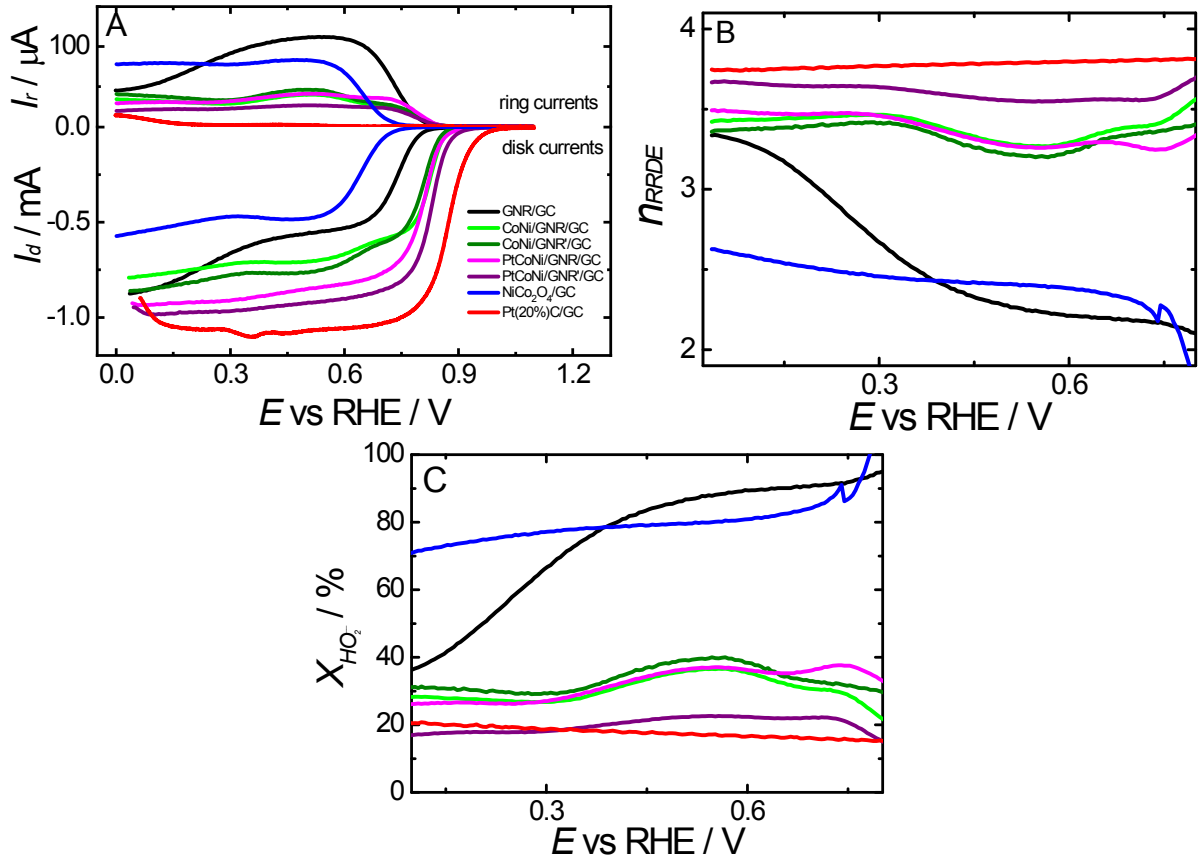

**Figure S19.** (A) Hydrodynamic linear scan (HLS) curves for different modified electrodes obtained in O<sub>2</sub>-saturated 0.1 M KOH. Scan rate: 5 mV s<sup>-1</sup> and  $\omega=1600$  rpm. Scans started at 0.00 V. The ring current responses for the bare Pt ring were obtained by maintaining this electrode at 1.1 V in O<sub>2</sub> saturated 0.1 M KOH, while the potentials on the modified GC disk electrodes were scanned in the same solution at different  $\omega$  values and 5 mV s<sup>-1</sup>. (B) Numbers of transferred electrons obtained using rotating ring-disk electrodes (RRDE) responses (A) ( $n_{RRDE}$ ) for different modified disk electrodes during ORR at different potentials and (C) percentages of hydrogen peroxide production (% HO<sub>2</sub><sup>-</sup>). Values of  $n_{RRDE}$  and % HO<sub>2</sub><sup>-</sup> were obtained from the corresponding HLS data at 1600 rpm based on (A) and obtained by equations S3–S6.

The HO<sub>2</sub><sup>-</sup> production ( $X_{HO_2^-}$  in terms of percentage) was calculated using molar flow rates of O<sub>2</sub> ( $\dot{n}_{O_2}$ ) and HO<sub>2</sub><sup>-</sup> ( $\dot{n}_{HO_2^-}$ ), using Equations S3 and S4 [31-33].

$$\dot{n}_{O_2} = \frac{I_{H_2O}}{4F} = \frac{I_{HO_2^-}}{2F}$$

Equation S3



$$\% HO_2^- = X_{HO_2^-} = \frac{\dot{n}_{O_2(2e^-)}}{\dot{n}_{O_2(2e^-)} + \dot{n}_{O_2(4e^-)}} = \frac{\frac{2 I_r}{N}}{I_d + \frac{I_r}{N}} \quad \text{Equation S4}$$

where  $I_{H_2O} = I_d - I_{HO_2^-}$ ,  $I_{HO_2^-} = I_r N^{-1}$ ,  $N = -\frac{I_r}{I_d}$ , and  $\frac{I_d}{n_{e^-}} = \frac{I_{H_2O}}{4} + \frac{I_{HO_2^-}}{2}$ ,  $I_{H_2O}$  and  $I_{HO_2^-}$  are the  $O_2$  reduction currents for water and  $HO_2^-$ , respectively,  $F$  is the Faraday constant ( $96485 \text{ C mol}^{-1}$ );  $I_r$  e  $I_d$  are the Pt ring and modified GC disk currents, respectively, and  $N$  is the collection efficiency value obtained experimentally.

The number of electrons ( $n_{RRDE}$ ) involved in the ORR was obtained using the following equation [31-33]:

$$n_{RRDE} = \frac{4 I_d}{I_d + I_r/N} \quad \text{Equation S5}$$

The collection efficiency ( $N$ ) needs to be calibrated for each experiment, considering the great influence of content and roughness of the catalyst, as well as the rotating rate of the electrode. The currents of the Pt ring electrode kept at 1.6 V were measured during the hydrodynamic voltammetry at various  $\omega$  for modified electrodes, in 0.1 M KOH  $N_2$ -saturated, containing 1 mM of  $K_3[Fe(CN)_6]$ . The  $N$  value was calculated using Equation S6 [31-33].

$$N = \frac{I_r}{I_d} \quad \text{Equation S6}$$

where  $I_r$  and  $I_d$  are the Pt ring and modified GC disk currents, respectively.

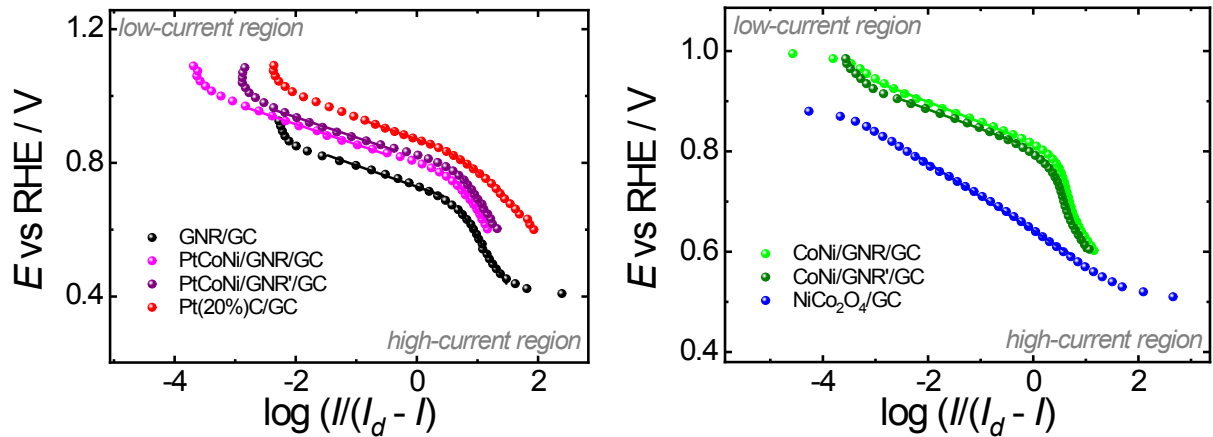

**Figure S20.** Tafel plots based on the data (during ORR) from Figures 3D, S7F, and S19A for different modified electrodes in  $O_2$ -saturated 0.1 M KOH.

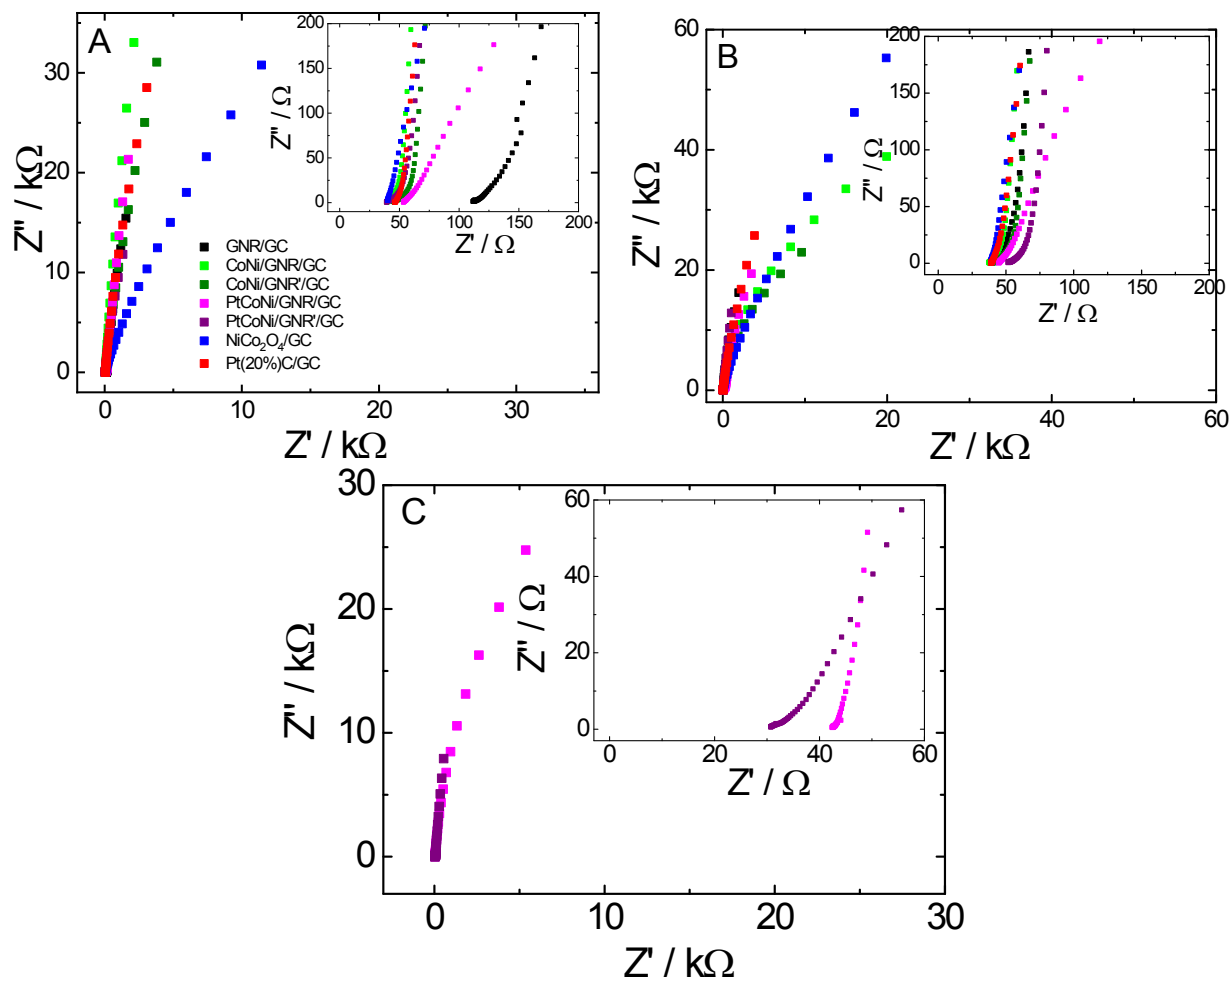

**Figure S21.** EIS results related to (A) initial electrochemical measurements, (B) after ORR, and (C) after ORR long-term stability test for different modified GC electrodes obtained in  $N_2$ -saturated 0.1 M KOH solution. Potential perturbation: 10 mV (rms). Frequency range: 100 kHz–10 mHz. Constant potential for EIS acquisition: OCP ((A) 0.92; (B) 0.88 V and (C) 0.92 V vs. RHE on average). Inset: Impedance plane plots restricted to (A) 200, (B) 200  $\Omega$  and (C) 60  $\Omega$ . The  $R_u$  value used for iR compensation in Figures 3D and S6F was 56.1  $\Omega$  on average.

## References

- [1] L. Yang, B. Zhang, B. Fang, L. Feng, *Chemical Communications*, 2018, **54**, 13151–13154.
- [2] B. Cui, H. Lin, J.-B. Li, X. Li, J. Yang, J. Tao, *Advanced Functional Materials*, 2008, **18**, 1440–1447.
- [3] R. Chen, H.-Y. Wang, J. Miao, H. Yang, B. Liun, *Nano Energy*, 2015, **11**, 333–340.
- [4] J. Wang, T. Qiu, X. Chen, Y. Lu, W. Yang, *Journal of Power Sources*, 2014, **268**, 341–348.
- [5] Y.-Z. Su, Q.-Z. Xu, G.-F. Chen, H. Cheng, N. Li, Z.-Q. Liu, *Electrochimica Acta* **2015**, *174*, 1216–1224.
- [6] C. Chang, L. Zhanga, C.-W. Hsu, X.-F. Chuah, S.-Y. Lu, , *ACS Applied Materials & Interfaces*, 2018, **10**, 417–426.
- [7] C. Zhu, S. Fu, D. Du, Y. Lin, *Chemistry—A European Journal*, 2016, **22**, 4000–4007.
- [8] Z. Li, B. Li, J. Chen, Q. Pang, P. Shen, *International Journal of Hydrogen Energy*, 2019, **44**, 16120–16131.
- [9] C. Luan, G. Liu, Y. Liu, L. Yu, Y. Wang, Y. Xiao, H. Qiao, X. Dai, X. Zhang, *ACS Nano*, 2018, **12**, 3875–3885.
- [10] Y. Gong, Z. Yang, Y. Lin, J. L. Wang, H. Pana, Z. Xu, *Journal of Materials Chemistry A* 2018, **6**, 16950–16958.
- [11] M. Yang, W. Lu, R. Jin, X.-C. Liu, S. Song, Y. Xing, *ACS Sustainable Chemistry & Engineering*, 2019, **7**, 12214–12221.
- [12] Y. Wang, Z. Zhang, X. Liu, F. Ding, P. Zou, X. Wang, Q. Zhao, H. Rao, *ACS Sustainable Chemistry & Engineering*, 2018, **6**, 12511–12521.
- [13] H. Fu, Y. Liu, L. Chen, Y. Shi, W. Kong, J. Hou, F. Yu, T. Wei, H. Wang, X. Guo, *Electrochimica Acta*, 2019, **296**, 719–729.
- [14] Y. Liu, P. Liu, W. Qin, X. Wu, G. Yang, *Electrochimica Acta*, 2019, **297**, 623–632.
- [15] S. Sun, X. Jin, B. Cong, X. Zhou, W. Hong, G. Chen, *Journal of Catalysis*, 2019, **379**, 1–9.
- [16] J. Wang, Y. Fu, Y. Xu, J. Wu, J.-H. Tian, R. Yang, *Internation Journal of Hydrogen Energy*, 2016, **41**, 8847-8854.
- [17] C. Broicher, F. Zeng, J. Artz, H. Hartmann, A. Besmehn, S. Palkovits, R. Palkovits, *ChemCatChem*, 2019, **11**, 412–416.
- [18] 3. Z. Chen, B. Zhao, Y.-C. He, H.-R. Wen, X.-Z. Fu, R. Sun, C.-P. Wong, *Materials Chemistry Frontiers*, 2018, **2**, 1155–1164.
- [19] C. C. L. McCrory, S. Jung, J. C. Peters, T. F. Jaramillo, *Journal of the American Chemical Society*, 2013, **135**, 16977–16987.
- [20] H. Ning, G. Li, Y. Chen, K. Zhang, Z. Gong, R. Nie, W. Hu, Q. Xia, *ACS Applied Materials & Interfaces*, 2019, **11**, 1957-1968.
- [21] L.-L. Ling, W.-J. Liu, S.-Q. Chen, X. Hu, H. Jiang, *ACS Applied Nano Materils*, 2018, **1**, 3331–3338.
- [22] A. Sivanantham, S. Shanmugam, *ChemElectroChem*, 2018, **5**, 1937–1943.
- [23] L. Zhang, J. M. T. A. Fischer, Y. Jia, X. Yan, W. Xu, X. Wang, J. Chen, D. Yang, H. Liu, L. Zhuang, M. Hankel, D. J. Searles, K. Huang, S. Feng, C. L. Brown, X. Yao, *Journal of the American Chemical Society*, 2018, **140**, 10757–10763.
- [24] S. Chen, Y. Zheng, B. Zhang, Y. Feng, J. Zhu, J. Xu, C. Zhang, W. Feng, T. Liu, *ACS Applied Materials & Interfaces*, 2019, **11**, 1384–1393.
- [25] G. Zhang, B. Y. Xia, X. Wang, X. W. (D.) Lo, *Advanced Materials*, 2014, **26**, 2408–2412.
- [26] X. Tong, S. Chen, C. Guo, X. Xia, X.-Y. Guo, *ACS Applied Materials & Interfaces*, 2016, **8**, 28274–28282.
- [27] Y. Xiao, C. Hu, L. Qu, C. Hu, M. Cao, *Chemistry—A European Journal*, 2013, **19**, 14271–14278.

- [28] D. Hassan, S. El-safy, K. A. Khalil, M. Dewidar, G. A. El-magd, *Materials*, 2016, **9**, 759 (1–15).
- [29] S. V. Devaguptapu, S. Hwang, S. Karakalos, S. Zhao, S. Gupta, D. Su, H. Xu, G. Wu, *ACS Applied Materials & Interfaces*, 2017, **9**, 44567–44578.
- [30] C. V. Boone, G. Maia, *Electrochimica Acta*, 2017, **247**, 19–29.
- [31] E. S. F. Cardoso, G. V. Fortunato, G. Maia, *ChemElectroChem*, 2018, **5**, 1691–1701.
- [32] E. S. F. Cardoso, G. V. Fortunato, G. Maia, *The Journal of Physical Chemistry C*, 2019, **123**, 16308–16316.
- [33] E. S. F. Cardoso, G. V. Fortunato, I. Palm, E. Kibena-Pöldsepp, A. S. Greco, J. L. R. Júnior, A. Kikas, M. Merisalu, V. Kisand, V. Sammelseg, K. Tammeveski, G. Maia, *Electrochimica Acta*, 2020, **344**, 136052.
